# Supplementary material for: The Efficacy of Additives for the Mitigation of Aflatoxins in Animal Feed: A Systematic Review and Network Meta-Analysis
Source: MDPI journal article supplement (doi:10.3390/toxins14100707), 2022-10-15
Supplement: s1 [file s1]

# Supplementary Materials: The efficacy of additives for the mitigation of aflatoxins in animal feed: a systematic review and network meta-analysis

Oluwatobi Kolawole, Wipada Siri-Anusornsak, Awanwee Petchkongkaw, Julie Meneely and Christopher Elliott

**Table S1.** Database search strategy with keywords to retrieve eligible articles for systematic review and network meta-analysis.

| Database       | Search keywords                                                                                                                                                                                                                                                                                                                                                                                                                                                                                                                                                                                                                                                                                                          | Number of articles |
|----------------|--------------------------------------------------------------------------------------------------------------------------------------------------------------------------------------------------------------------------------------------------------------------------------------------------------------------------------------------------------------------------------------------------------------------------------------------------------------------------------------------------------------------------------------------------------------------------------------------------------------------------------------------------------------------------------------------------------------------------|--------------------|
| Scopus         | DOCTYPE ( ar ) TITLE ( poultry* OR chicken* OR broiler* ) ABS ( clay* OR "clay mineral" OR modified* OR "modified clay" OR agriculture* OR "agricultural waste" OR fibres* OR "fibers" OR "yeast" OR polymers* OR plants* OR enzyme* OR bacteria* OR fungi* OR "yeast cell wall" OR glucomannan* OR "antioxidant" )<br>ABS ( feed* ) ABS ( aflatoxin* )                                                                                                                                                                                                                                                                                                                                                                  | 228                |
| Web of Science | ((TI=(poultry* OR chicken* OR broiler*)) AND AB=(clay* OR "clay mineral" OR modified* OR "modified clay" OR agriculture* OR "agricultural waste" OR fibres* OR "fibers" OR "yeast" OR polymers* OR plants* OR enzyme* OR bacteria* OR fungi* OR "yeast cell-wall" OR glucomannan* OR antioxidant*)) AND AB=( feed*)) AND AB=(aflatoxin*)                                                                                                                                                                                                                                                                                                                                                                                 | 221                |
| PubMed         | (((((poultry*[Title] OR chicken*[Title] OR broiler*[Title])) AND (clay*[Title/Abstract] OR "clay mineral" [Title/Abstract] OR modified* [Title/Abstract] OR "modified clay" [Title/Abstract] OR agriculture* [Title/Abstract])) OR "agricultural waste" [Title/Abstract] OR fibres* [Title/Abstract] OR "fibers" [Title/Abstract] OR "yeast" [Title/Abstract] OR "yeast cell wall" [Title/Abstract] OR polymers* [Title/Abstract] OR plant* [Title/Abstract] OR enzyme* [Title/Abstract] OR bacteria* [Title/Abstract] OR fungi* [Title/Abstract] OR "yeast cell wall" [Title/Abstract] OR glucomannan* [Title/Abstract] OR antioxidant* [Title/Abstract] AND (feed*[Title/Abstract])) AND (aflatoxin*[Title/Abstract])) | 561                |

**Table S2.** The network estimates for all possible treatment comparisons with effect size estimates and confidence intervals

| V1                   | V2                   | V3                   | V4                   |
|----------------------|----------------------|----------------------|----------------------|
| Antioxidant          | -1.69 ( -3.63; 0.25) | 2.70 ( -9.94; 15.34) | -0.54 ( -2.93; 1.84) |
| -1.82 (-3.45; -0.18) | Control              | 2.99 ( 0.00; 5.98)   | 1.60 ( -0.55; 3.75)  |
| 1.01 (-1.77; 3.80)   | 2.83 ( 0.38; 5.28)   | Inorganic Binder     | -0.81 ( -4.96; 3.35) |
| -0.29 (-2.09; 1.51)  | 1.53 (-0.14; 3.19)   | -1.30 (-3.92; 1.32)  | Organic Binder       |

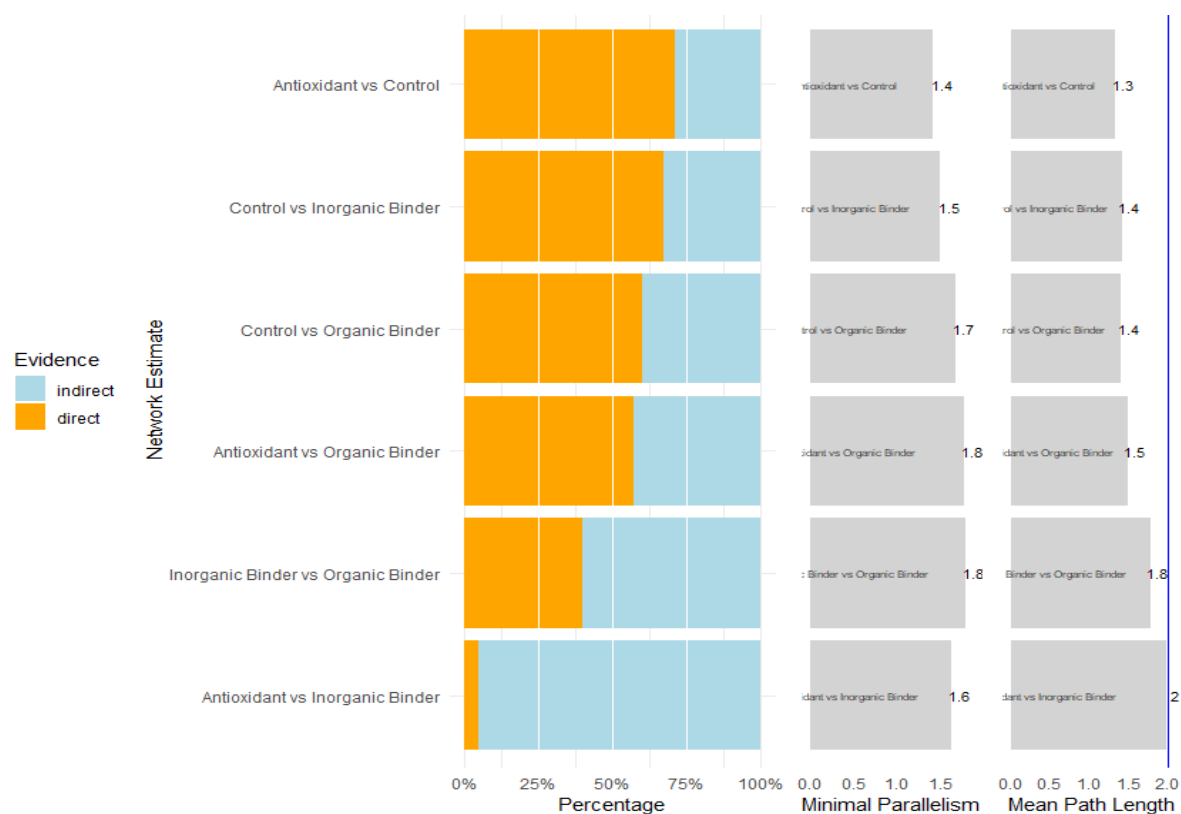

**Figure S1.** Plot showing the percentage of direct and indirect evidence used for each estimated comparison.

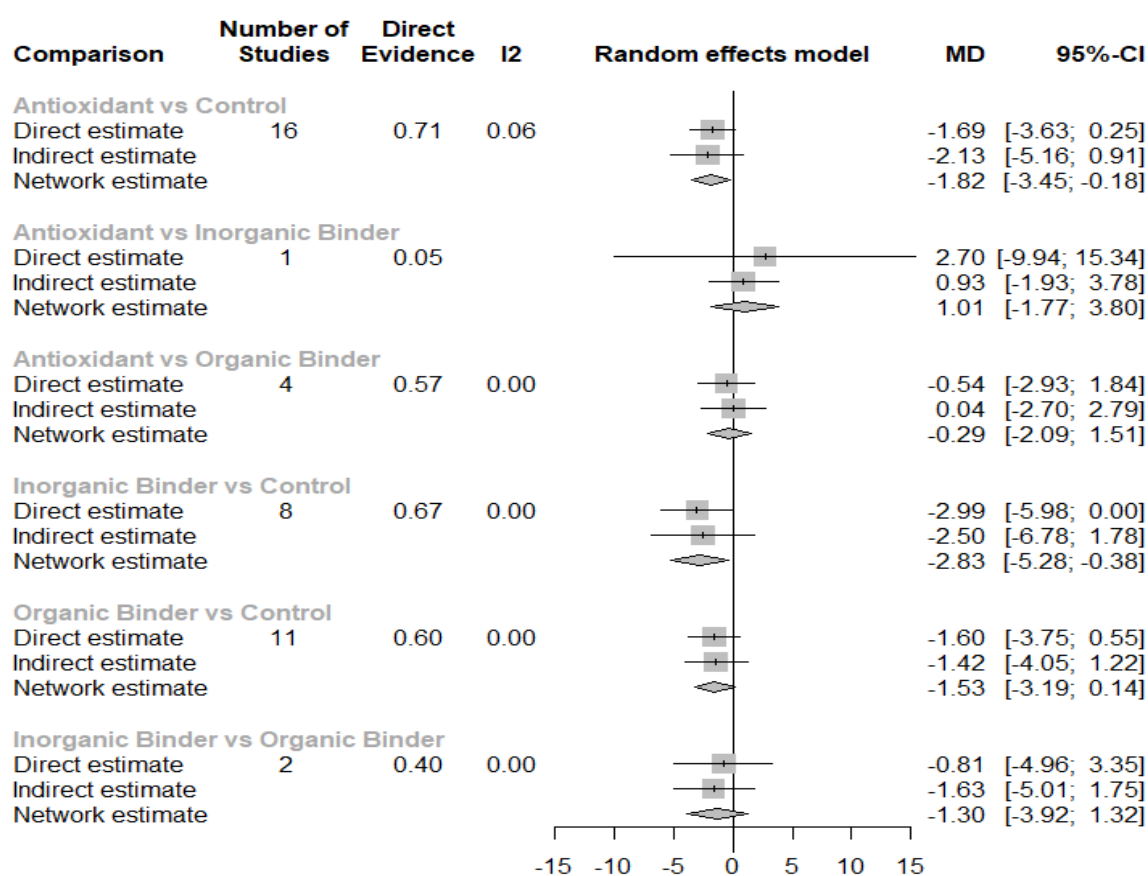

**Figure S2.** Netsplit forest plot showing the consistency of contribution of direct and indirect evidence estimates of individual comparisons in our network

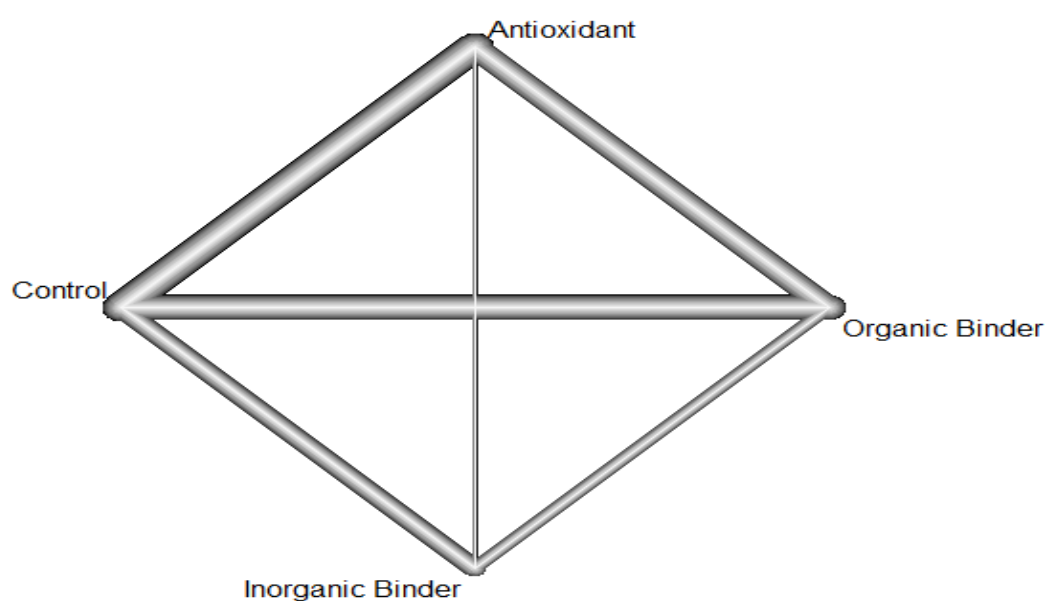

**Figure S3.** Network graph of treatment comparisons. The thicknesses of the lines correspond to the number of comparisons.
